# Supplementary material for: Nickel-rich layered LiNi1−xMxO2(M = Mn, Fe, and Co) electrocatalysts with high oxygen evolution reaction activity
Source: Royal Society of Chemistry journal article supplement (doi:10.1039/c5ta04637h), 2015-01-01
Supplement: c5ta04637h1.pdf [file c5ta04637h1.pdf]

**Electronic Supplementary Information**

**Nickel-Rich Layered  $\text{LiNi}_{1-x}\text{M}_x\text{O}_2$  ( $M = \text{Mn, Fe, and Co}$ ) Electrocatalysts with High Oxygen Evolution Reaction Activity**

Veronica Augustyn, Soosairaj Therese, Travis C. Turner, and Arumugam Manthiram

Materials Science and Engineering Program & Texas Materials Institute  
The University of Texas at Austin  
Austin, TX 78712, USA

**Table S1.** BET surface areas of selected  $\text{LiNi}_{1-x}\text{M}_x\text{O}_2$  ( $M = \text{Mn, Fe, and Co}$ ) compounds investigated for the OER

| Composition                                          | BET Surface Area<br>( $\text{m}^2 \text{g}^{-1}$ ) |
|------------------------------------------------------|----------------------------------------------------|
| $\text{LiNiO}_2$ , 850°C                             | 1.2                                                |
| $\text{LiNi}_{0.9}\text{Co}_{0.1}\text{O}_2$ , 850°C | 1.3                                                |
| $\text{LiNi}_{0.9}\text{Mn}_{0.1}\text{O}_2$ , 850°C | 1.2                                                |
| LNFO, 750°C                                          | 3.2                                                |

**Figure S1.** 7-point BET data for  $\text{LiNiO}_2$ ,  $\text{LiNi}_{0.9}\text{Co}_{0.1}\text{O}_2$ ,  $\text{LiNi}_{0.9}\text{Mn}_{0.1}\text{O}_2$ , and LNFO used to calculate the surface areas shown in Table S1.

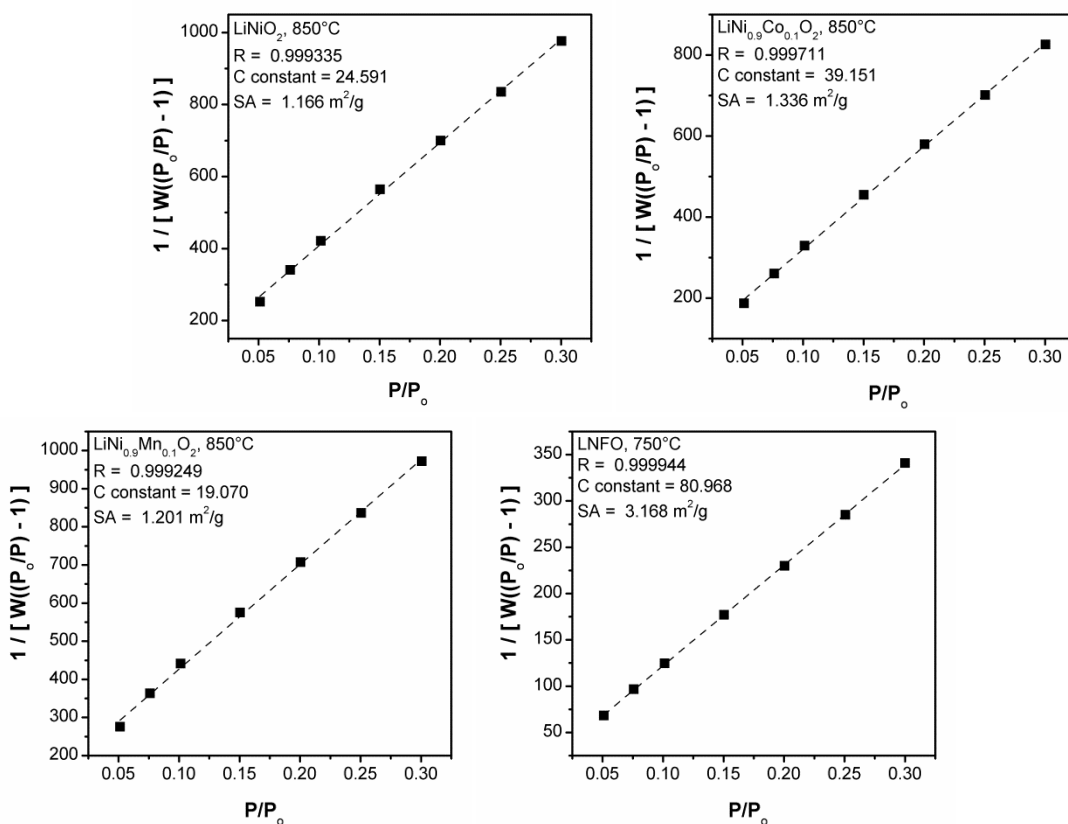

**Table S2.** Capacity (Q) of pre-OER redox peaks calculated from third cycle CVs at 10 mV s<sup>-1</sup> for LiNi<sub>1-x</sub>M<sub>x</sub>O<sub>2</sub> and Ni<sub>1-x</sub>M<sub>x</sub>(OH)<sub>x</sub>

| <b>Composition</b>                                                      | <b>Q<sub>anodic</sub> (C g<sup>-1</sup>)</b> | <b>Q<sub>cathodic</sub> (C g<sup>-1</sup>)</b> |
|-------------------------------------------------------------------------|----------------------------------------------|------------------------------------------------|
| LNO                                                                     | 2.7                                          | 5.0                                            |
| Ni(OH) <sub>2</sub>                                                     | 146.6                                        | 169.9                                          |
| LNFO                                                                    | 1.2                                          | 3.9                                            |
| Ni <sub>0.9</sub> Fe <sub>0.1</sub> (OH) <sub>x</sub>                   | 38.7                                         | 40.4                                           |
| LNMO                                                                    | 10.7                                         | 21.6                                           |
| Ni <sub>0.7</sub> Mn <sub>0.3</sub> (OH) <sub>x</sub>                   | 17.5                                         | 17.7                                           |
| LNMFO                                                                   | 1.4                                          | 3.8                                            |
| Ni <sub>0.7</sub> Mn <sub>0.2</sub> Fe <sub>0.1</sub> (OH) <sub>x</sub> | 12.3                                         | 18.5                                           |
| LNCO                                                                    | 5.2                                          | 6.8                                            |
| Ni <sub>0.7</sub> Co <sub>0.3</sub> (OH) <sub>x</sub>                   | 37.3                                         | 38.1                                           |
| LNCFO                                                                   | 18.2                                         | 29.0                                           |
| LNCFO- $\delta$                                                         | 32.0                                         | 43.8                                           |
| Ni <sub>0.7</sub> Co <sub>0.3</sub> Fe <sub>0.1</sub> (OH) <sub>x</sub> | 26.9                                         | 33.2                                           |

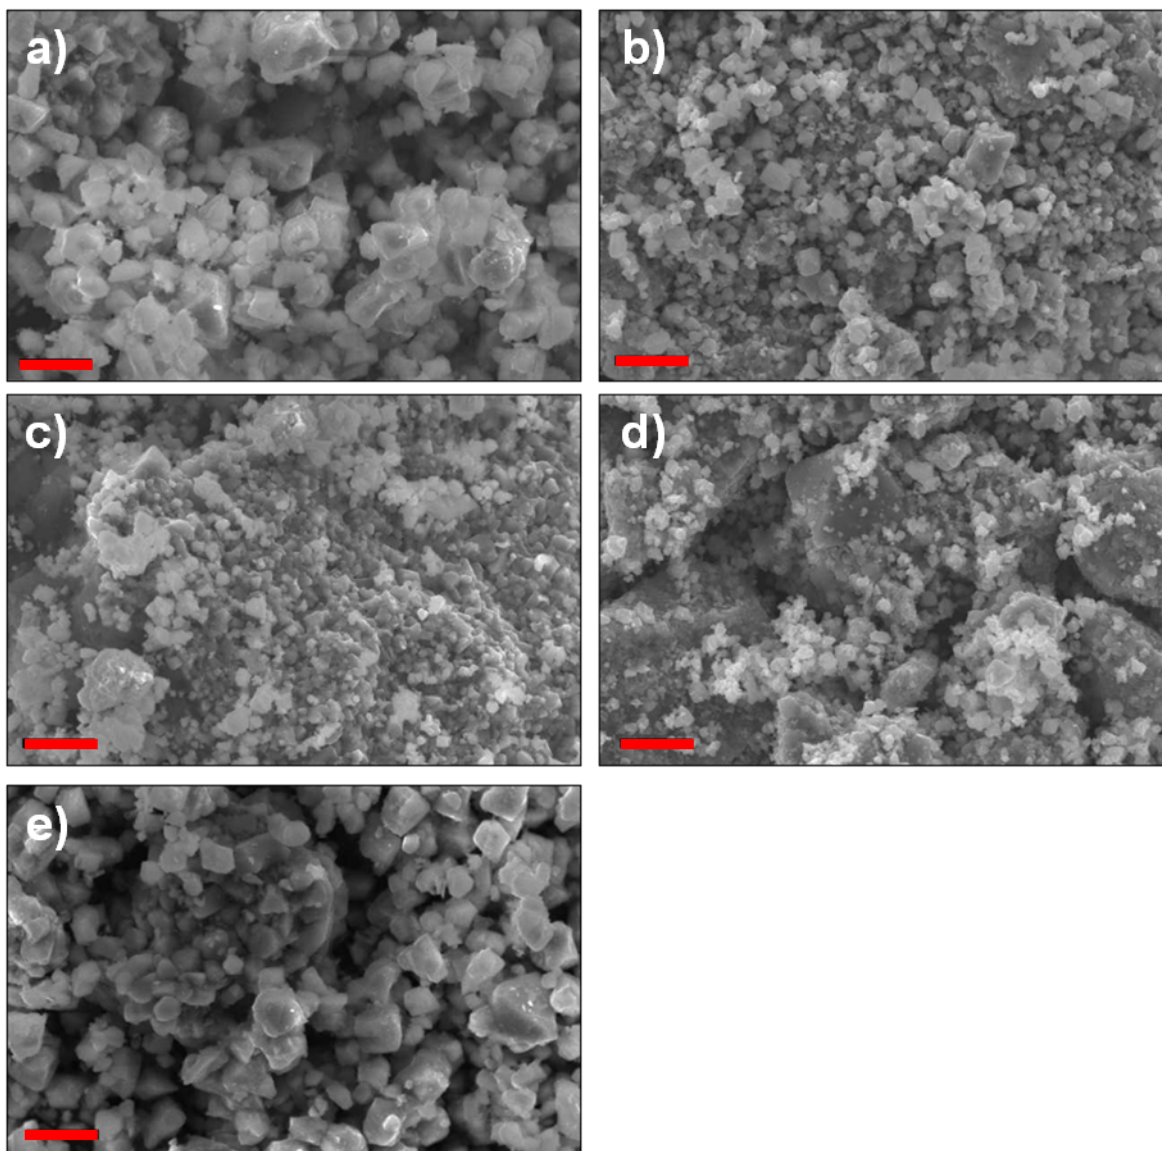

**Figure S2.** SEM images of the  $\text{LiNi}_{1-x}\text{M}_x\text{O}_2$  samples, synthesized at 850 °C in air, investigated for the OER: (a)  $\text{LiNiO}_2$ , (b)  $\text{LiNi}_{0.95}\text{Mn}_{0.05}\text{O}_2$ , (c)  $\text{LiNi}_{0.9}\text{Mn}_{0.1}\text{O}_2$ , (d)  $\text{LiNi}_{0.85}\text{Mn}_{0.15}\text{O}_2$ , and (e)  $\text{LiNi}_{0.9}\text{Co}_{0.1}\text{O}_2$ . Scale bar = 5  $\mu\text{m}$ .

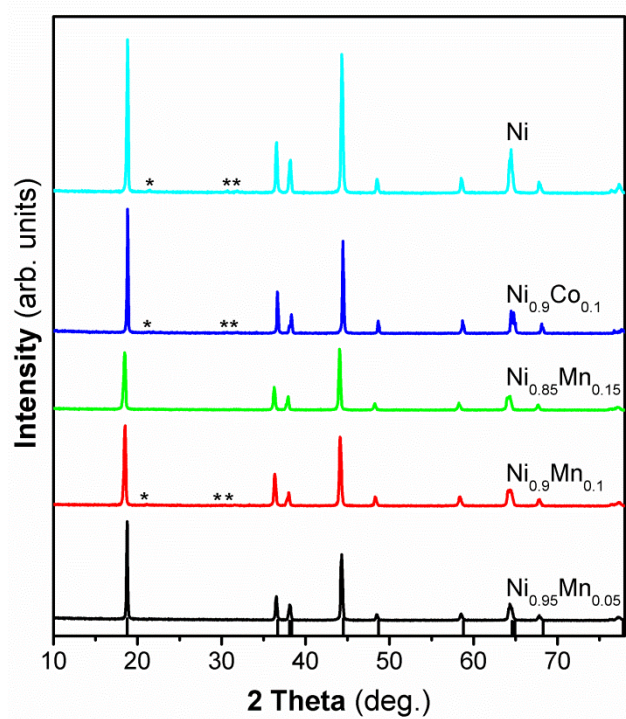

**Figure S3.** XRD patterns of  $\text{LiNi}_{1-x}\text{M}_x\text{O}_2$  synthesized at  $850^\circ\text{C}$  in air. The samples all crystallize in the O3 layered structure; the reference pattern is shown at the bottom (PDF# 00-056-1441,  $\text{LiNi}_{0.85}\text{Co}_{0.15}\text{O}_2$ ). \* denotes  $\text{Li}_2\text{CO}_3$  impurity present due to the high-temperature synthesis in air.

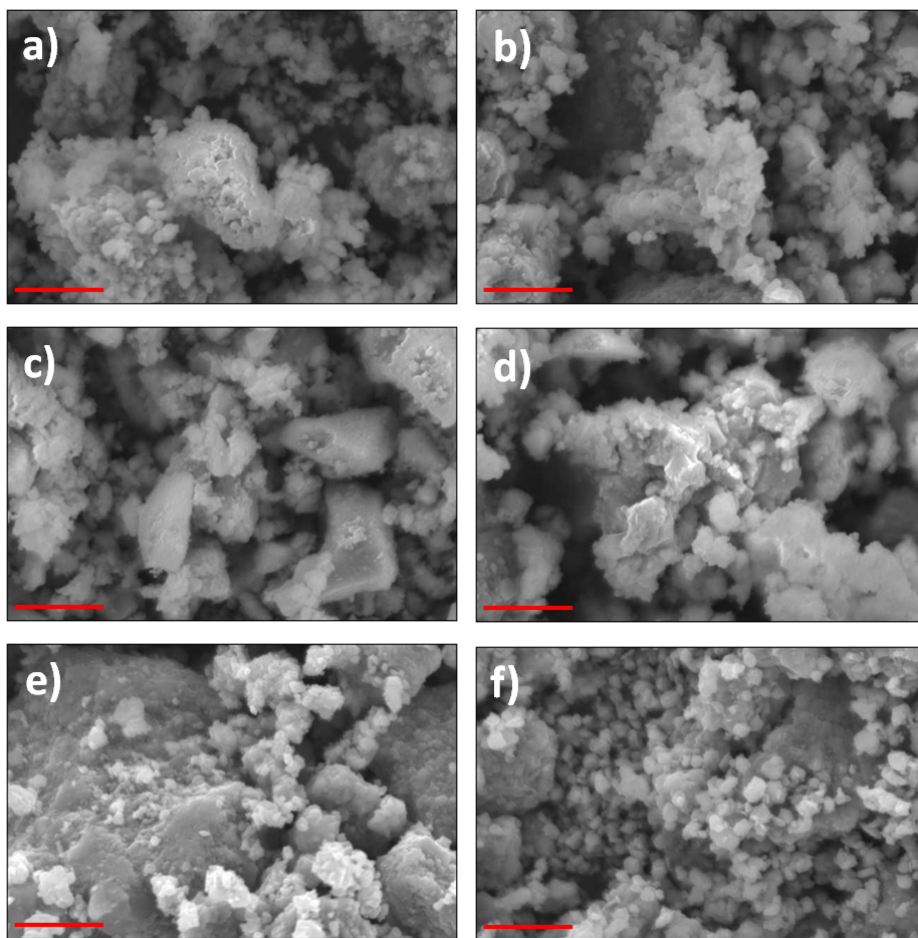

**Figure S4.** SEM images of the  $\text{LiNi}_{1-x}\text{M}_x\text{O}_2$  samples, synthesized at  $750^\circ\text{C}$  in  $\text{O}_2$ , investigated for the OER: (a) LNO, (b) LNFO, (c) LNMO, (d) LNMFO, (e) LNCO, (f) LNCFO- $\delta$ . Scale bar =  $5\ \mu\text{m}$ .

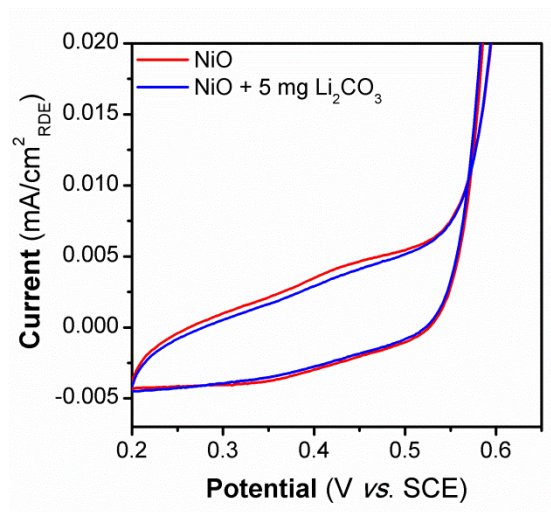

**Figure S5.** As Ni content and Li content increase during high-temperature synthesis, Ni-rich  $\text{LiMO}_2$  tend to form  $\text{Li}_2\text{CO}_3$  impurity even in an oxygen-rich atmosphere. To explore the effect of the small amount of  $\text{Li}_2\text{CO}_3$  impurity present in the samples on OER activity, 5 mg of  $\text{Li}_2\text{CO}_3$  was added to the standard ink preparation of NiO (25 mg active material, 5 mg acetylene black, 154  $\mu\text{L}$  of Nafion/0.1 M NaOH solution, 4.5 mL water, and 0.5 mL isopropanol). There was no observed effect of  $\text{Li}_2\text{CO}_3$  on the pre-OER redox peaks or the OER onset potential. We hypothesize that the efficient rotation of the RDE (1600 rpm) quickly diffuses away the carbonate impurity into the electrolyte ( $\sim 150$  mL of 0.1 M KOH).

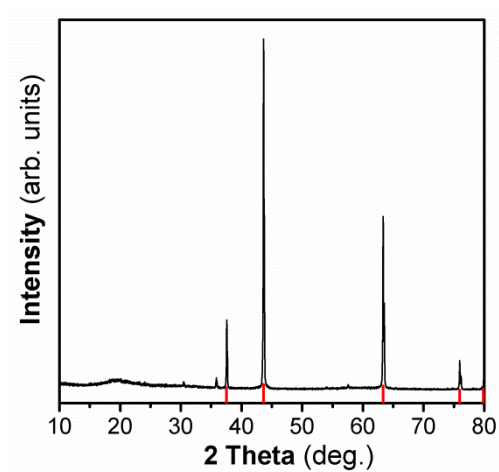

**Figure S6.** XRD pattern of LiFeO<sub>2</sub> (ICP composition: Li<sub>1.01</sub>Fe<sub>0.99</sub>O<sub>2</sub>) synthesized by a solid-state reaction between Fe<sub>2</sub>O<sub>3</sub> and Li<sub>2</sub>CO<sub>3</sub> at 750 °C in air. The major reflections correlate with the disordered cubic structure of  $\alpha$ -LiFeO<sub>2</sub> (PDF# #00-017-0938).



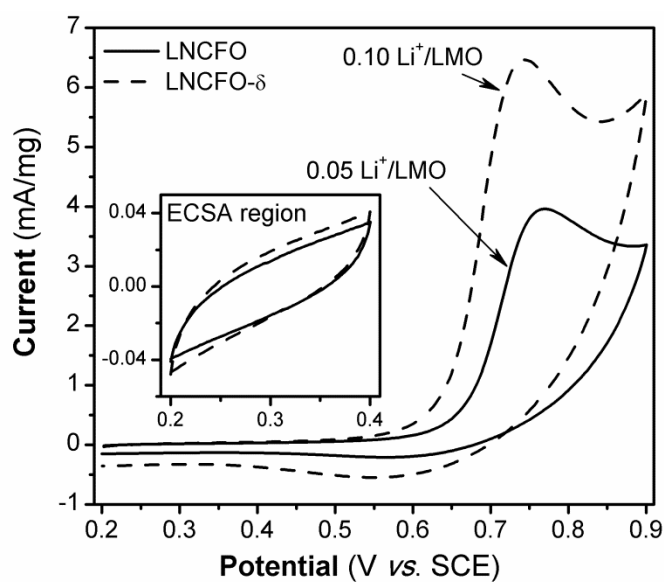

**Figure S7.** First cycle CVs in 0.5 M  $\text{Li}_2\text{SO}_4$  at  $10 \text{ mV s}^{-1}$  for LNCFO and LNCFO- $\delta$ . The capacity associated with the anodic peak current corresponds to the irreversible extraction of  $\text{Li}^+$  from  $\text{LiMO}_2$ . More  $\text{Li}^+$  is extracted from LNCFO- $\delta$  (which also contained more  $\text{Li}^+$  in the as-synthesized state) and this compound had higher OER activity.

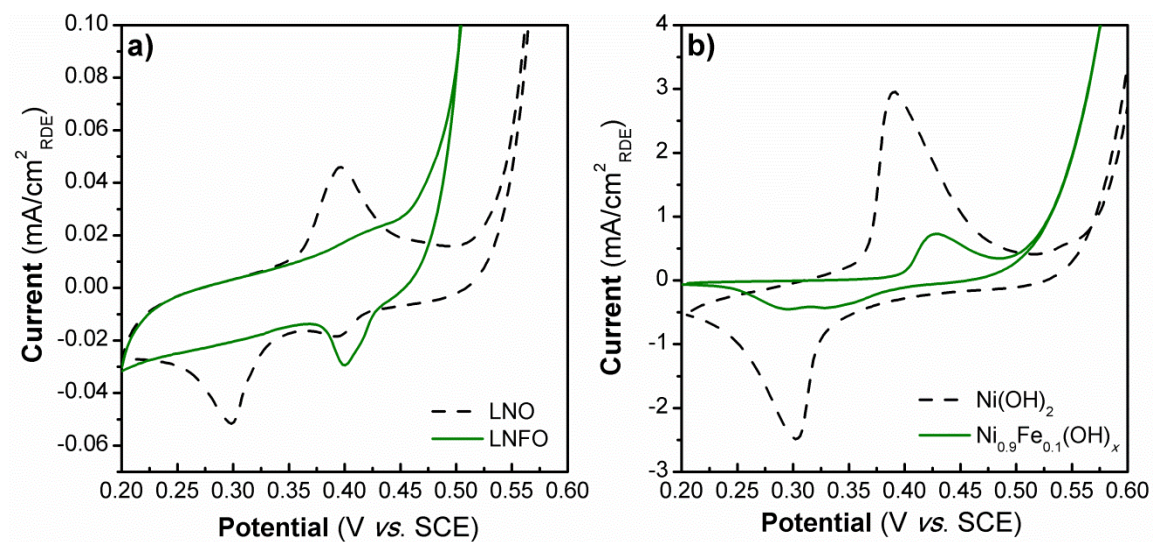

**Figure S8.** Comparison of the pre-OER redox peaks in (a) LNO and LNFO (synthesized at 750 °C in flowing O<sub>2</sub>) and (b) Ni(OH)<sub>2</sub> and Ni<sub>0.9</sub>Fe<sub>0.1</sub>(OH)<sub>x</sub> synthesized at room temperature and used as precursors for the solid-state synthesis.

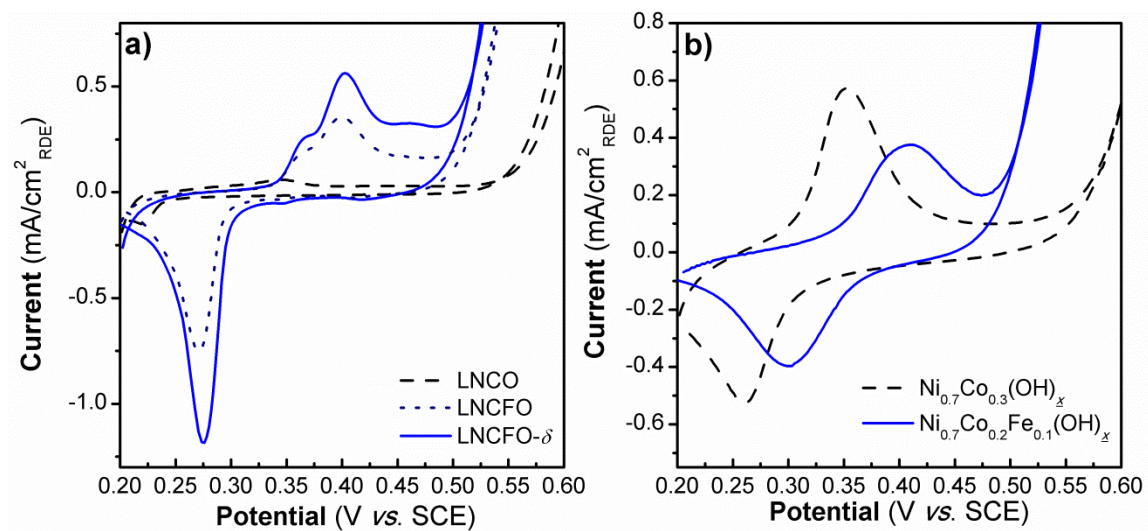

**Figure S9.** Comparison of the pre-OER redox peaks in (a) LNCO, LNCFO, and LNCFO- $\delta$  (synthesized at 750 °C in flowing O<sub>2</sub>) and (b)  $\text{Ni}_{0.7}\text{Co}_{0.3}(\text{OH})_x$  and  $\text{Ni}_{0.7}\text{Co}_{0.2}\text{Fe}_{0.1}(\text{OH})_x$  synthesized at room temperature and used as precursors for the solid-state synthesis.

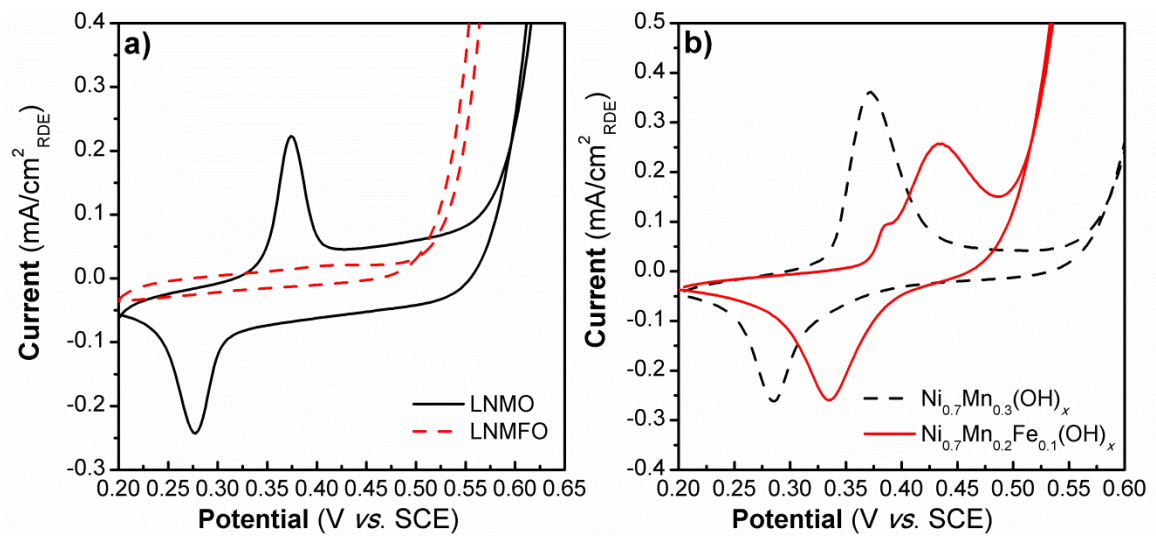

**Figure S10.** Comparison of the pre-OER redox peaks in (a) LNMO and LNMFO (synthesized at 750 °C in flowing O<sub>2</sub>) and (b)  $\text{Ni}_{0.7}\text{Mn}_{0.3}(\text{OH})_x$  and  $\text{Ni}_{0.7}\text{Mn}_{0.2}\text{Fe}_{0.1}(\text{OH})_x$  synthesized at room temperature and used as precursors for the solid-state synthesis.

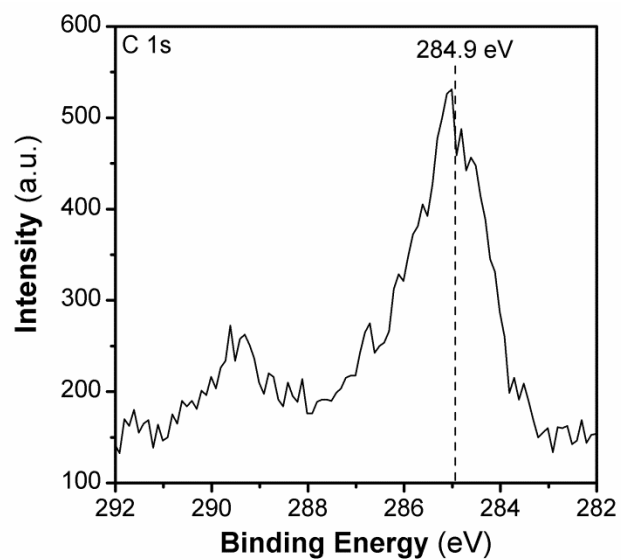

**Figure S11.** XPS of the C 1s spectrum of LNFO. The tallest peak, corresponding to adsorbed adventitious hydrocarbons (284.9 eV), was used for calibration of the spectrum.
